# Supplementary material for: Database Mining Detected a Cuproptosis-Related Prognostic Signature and a Related Regulatory Axis in Breast Cancer
Source: PubMed Central journal article supplement (PMC9605827; doi:10.1155/2022/9004830), 2022-10-19
Supplement: 9004830.f1.pdf [file 9004830.f1.pdf]

Antibody HPA028689

Normal tissue

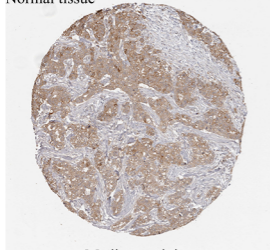

Medium staining

Breast cancer  
tissue

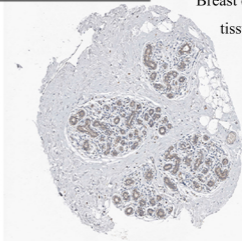

Low staining
